# Supplementary material for: The templating effect of diammonium cations on the structural and optical properties of lead bromide perovskites: a guide to design broad light emitters
Source: Royal Society of Chemistry journal article supplement (doi:10.1039/d2tc02113g), 2022-01-01
Supplement: d2tc02113g3.pdf [file d2tc02113g3.pdf]

## **ELECTRONIC SUPPLEMENTARY INFORMATION**

Templating Effect of Diammonium Cations on the  
Structural and Optical Properties of Lead Bromide  
Perovskites: a Guide to Design Broad Light Emitters

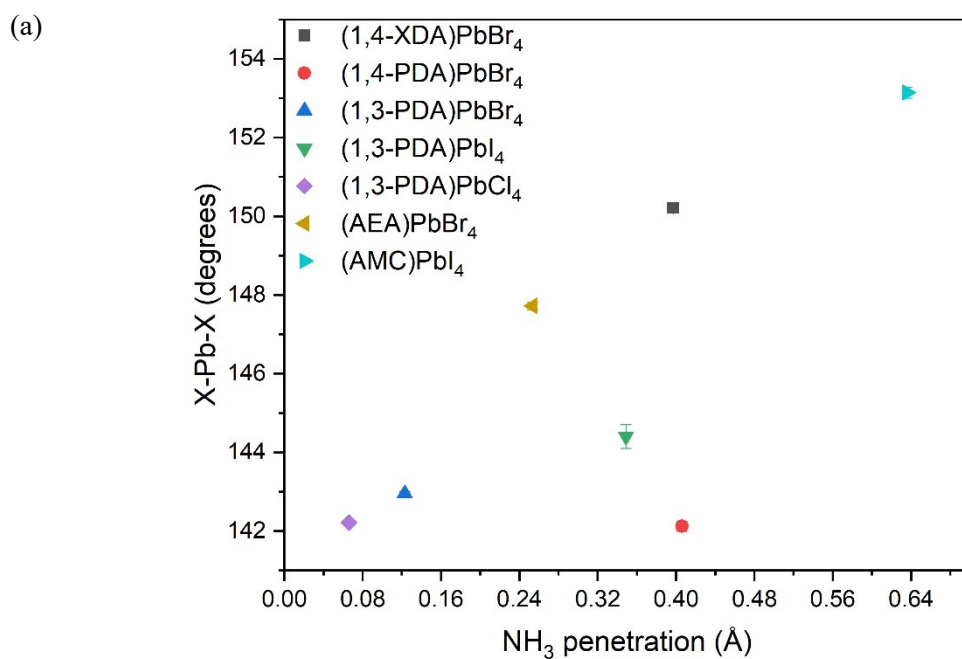

(b)

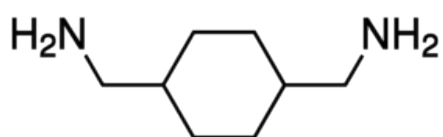

AMC

(c)

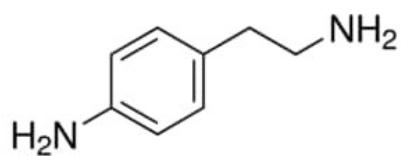

AEA

**Figure S1-** (a) Variation of the Pb–X–Pb bond angle as a function of NH<sub>3</sub> penetration; (b) molecular structure of 1,4-bis(ammoniomethyl)cyclohexane, and (c) molecular structure of 3-(2-ammonioethyl)aniline.

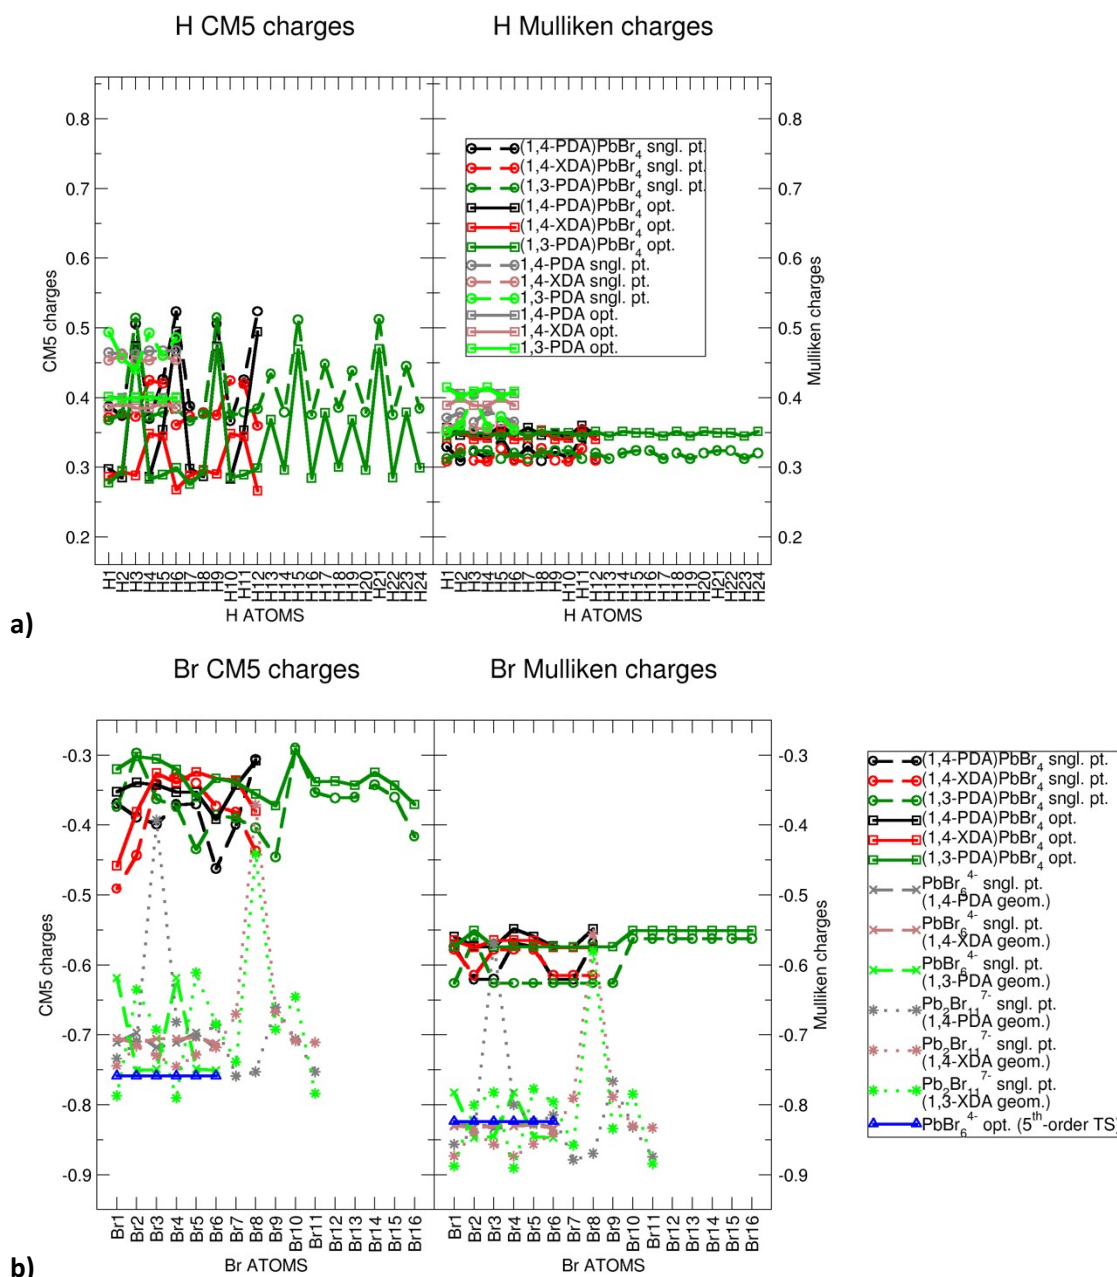

Figure S2. Charges on (a) aminic H and (b) Br of various systems compared in this work as calculated by the CM5 (a, left; b, left) and Mulliken (a, right; b, right) methods at the HSE06/SDD/6-31G(*d,p*) level of DFT (see SI Materials and Methods below for details). More specifically, charges on perovskites (1,4-PDA)PbBr<sub>4</sub> (black), (1,4-XDA)PbBr<sub>4</sub> (red), and (1,3-PDA)PbBr<sub>4</sub> (green), are calculated both after single-point energy calculations (dotted lines, circles), and after optimization (solid lines, squares). Charges on isolated diammonium cations 1,4-PDA<sup>2+</sup> (gray), 1,4-XDA<sup>2+</sup> (pink), 1,3-PDA<sup>2+</sup> (light green) (panel a only) are calculated both after single-point energy calculations in the gas phase (on perovskite-distorted geometries; dotted lines, circles) and after optimization (solid lines, squares). Charges on isolated [PbBr<sub>6</sub>]<sup>4-</sup> (dotted lines, x) and [Pb<sub>2</sub>Br<sub>11</sub>]<sup>7-</sup> octahedra (shorter dotted lines, \*; panel b only) are calculated only after single-point energy calculations in the gas phase on their (1,4-PDA)PbBr<sub>4</sub> (gray), (1,4-XDA)PbBr<sub>4</sub> (pink), and (1,3-PDA)PbBr<sub>4</sub> (light green) geometries. Charges have also been calculated on [PbBr<sub>6</sub>]<sup>4-</sup> (solid blue line, blue triangles, panel b), which optimizes in the gas phase to an octahedral 5<sup>th</sup>-order transition state (TS). H1-H24 and Br1-Br16 (*x*-axes) denote individual atoms, as *Gaussian16* uses several replicas of the unit cell to recreate whole molecules: note that this atom numbering does not match the one in crystallographic data. Fluctuations on certain H atoms in perovskites are an artifact (\*see SI explanation). Ranges of the *y*-axes are identical in all panels. Calculations are available electronically.

\*As a note of caution, the more notable fluctuations in CM5 charges<sup>11</sup> observed for certain H atoms in single-point and optimized (1,4-PDA)PbBr<sub>4</sub> and (1,3-PDA)PbBr<sub>4</sub> (panel a, black and green lines, respectively) should be disregarded: they refer to individual H atoms H3, H6, H9, H12 in the former case, and H atoms H3, H9, H14, H21 in the latter case, which get “cut” by *Gaussian16* when recreating the minimal cell necessary for the calculation, and are assigned slightly larger charges as a result of a flaw in *Gaussian16*'s partitioning of the electron density under periodic boundary conditions. Such effect is not observed with Mulliken charges.<sup>12</sup>

With this *caveat* in mind, it is evident across all cases studied that Br and H charges fluctuate over a  $\sim 0.2e$  range (or smaller) in all scenarios, and that perovskite charges overlap in all cases; in other words, there is no systematic increase or decrease in any one particular perovskite.

Other interesting aspects to note:

- Charge transfer from Br to H upon perovskite formation is consistently reproduced.
- In double octahedra [Pb<sub>2</sub>Br<sub>11</sub>]<sup>7-</sup> (see description in SI Materials and Methods), the vertex-shared Br<sup>-</sup> (Br3 in the 1,4-PDA(PbBr<sub>4</sub>) distortion; Br8 in the other two cases) is consistently assigned smaller negative charges, which approach values close to those assigned in the perovskites.

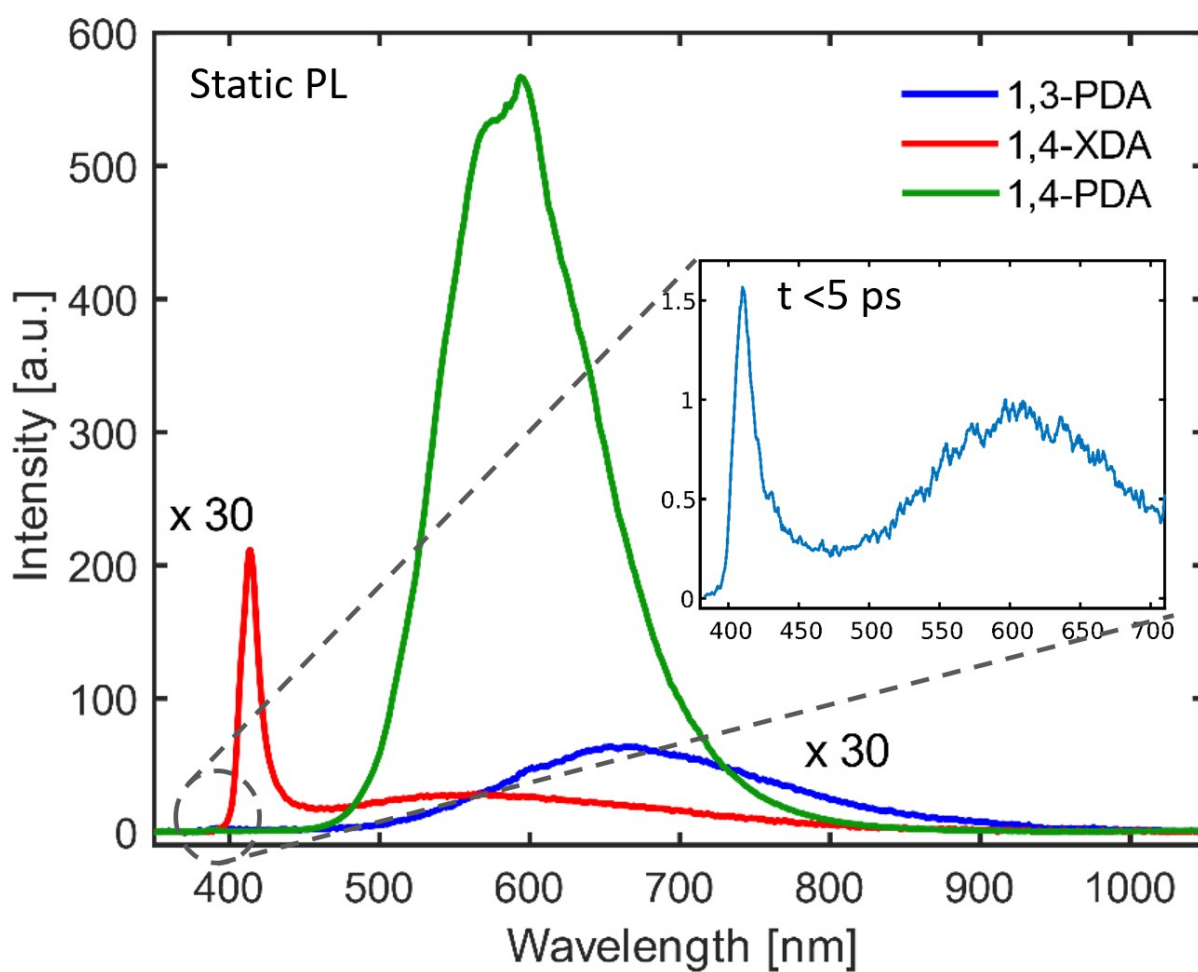

**Figure S3:** comparison between static photoluminescence spectra at 77K. Inset: spectrum of 1,3-PDA at 77K during the first 5 ps of emission (retrieved from high resolution time resolved data), highlighting the feature at 420 nm which is particularly prominent at early decays.

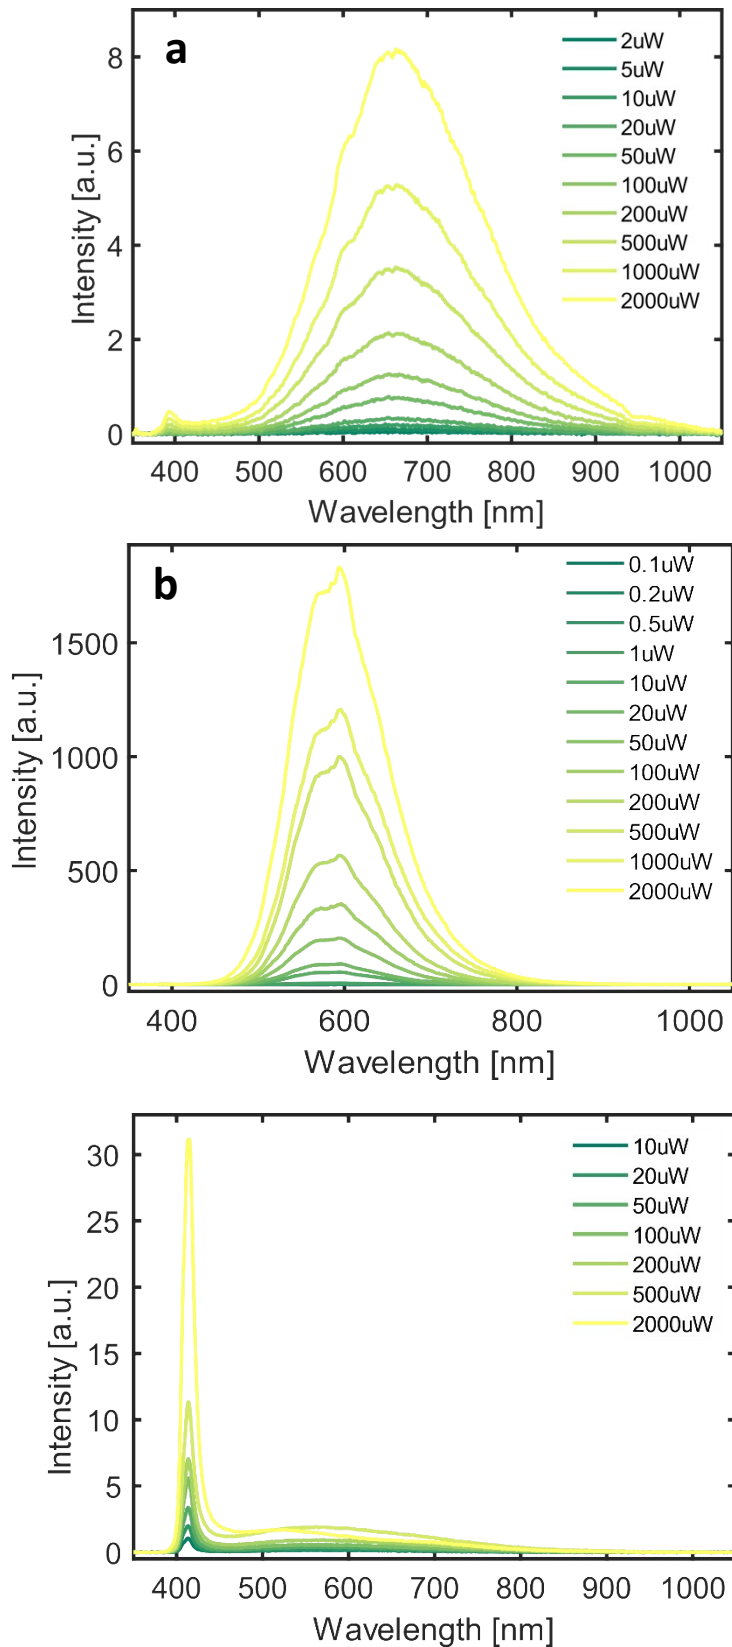

**Figure S4:** Fluence-dependent photoluminescence spectra at 77K of: a)1,3-PDA b)1,4-PDA c)1,4-XDA. All spectra are recorded using  $\lambda_{\text{ex}}$  of 355nm pulsed laser (1Khz)

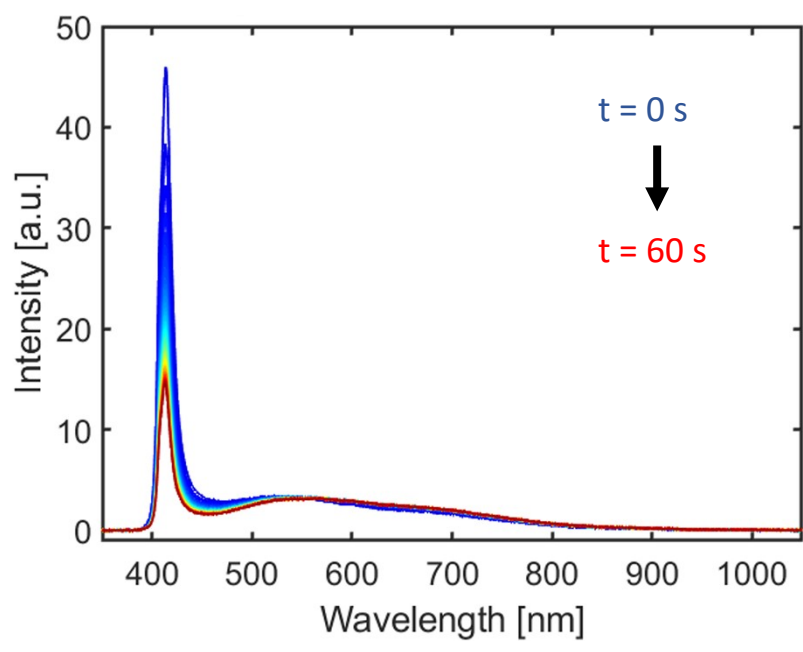

**Figure S5:** 1,4-XDA PL evolution in time using a  $\lambda_{\text{ex}}$  of 355nm pulsed laser (1Khz) at 2000uW

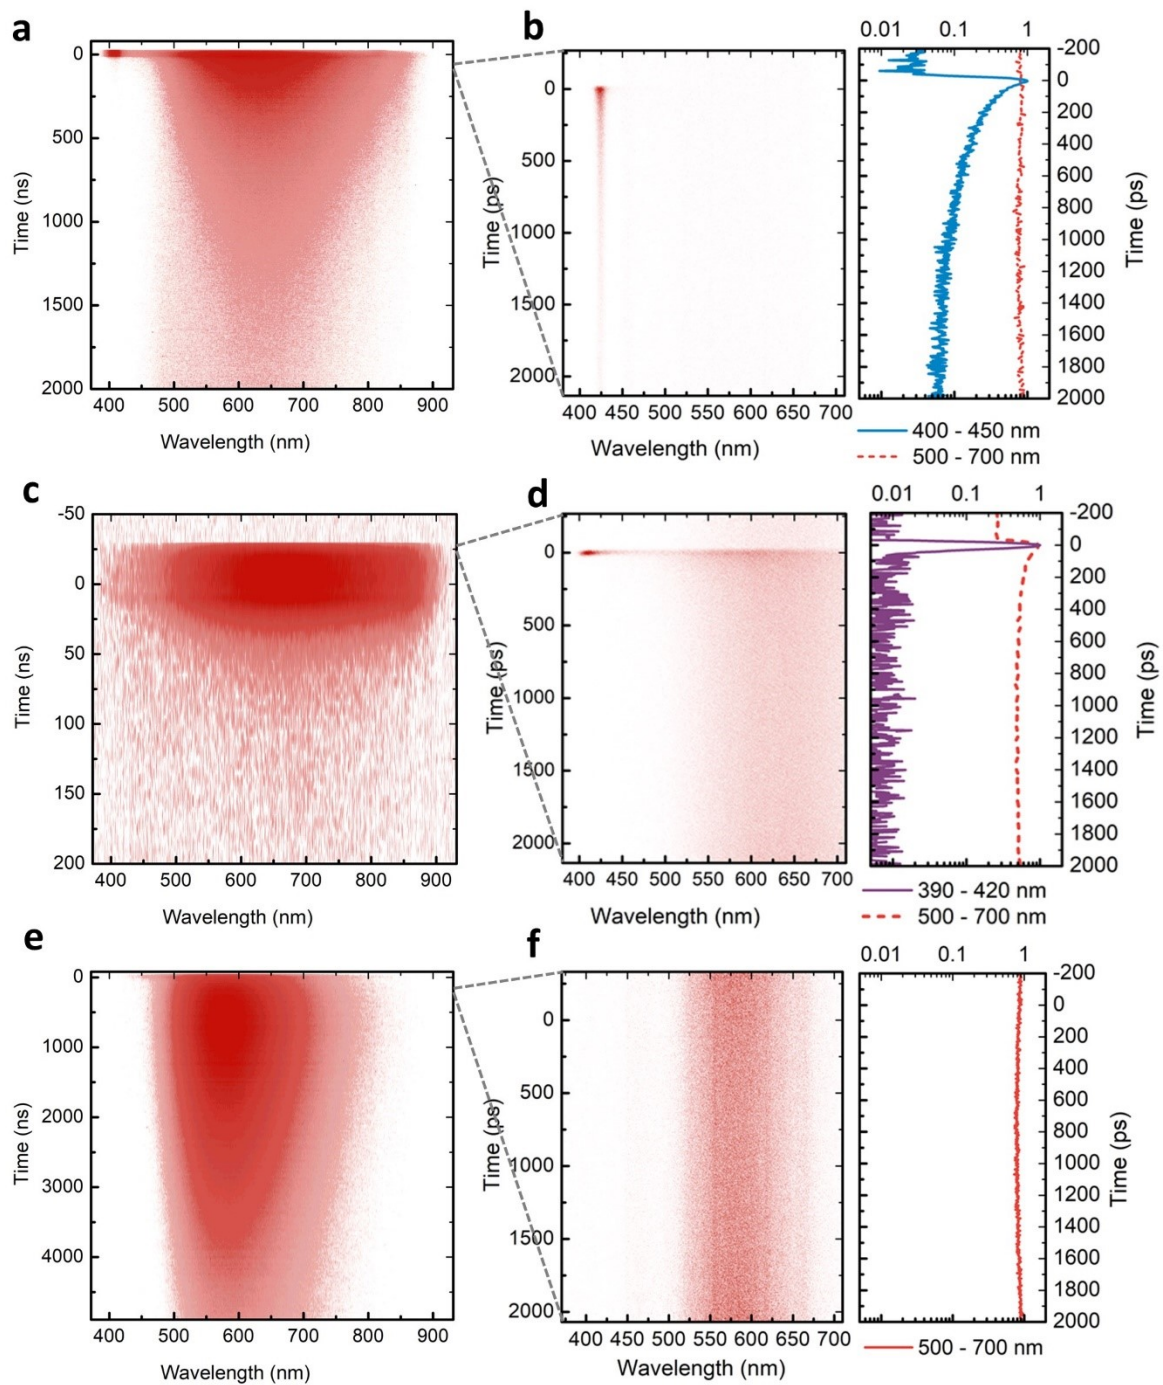

**Figure S6:** Time resolved spectra in ns (left) and ps (right) time range of sample a,b) 1,4-XDA c,d) 1,3-PDA and e,f) 1,4-PDA



## Materials and methods

### Synthesis

Single crystals of (1,3-PDA)PbBr<sub>4</sub>, (1,4-PDA)PbBr<sub>4</sub>, (1,3-XDA)PbBr<sub>4</sub> and (1,4-XDA)PbBr<sub>4</sub> were grown by dissolving a proper amount of lead(II) acetate powder in a large excess of 48% w/w aqueous HBr and 50% w/w aqueous H<sub>3</sub>PO<sub>2</sub>, heating the mixture to boiling point. After the solid dissolution, the stoichiometric amount of the solid diamine (liquid for the 1,3-XDA) was added. The crystals formation was obtained by a slow cooling down to room temperature at 2°C h<sup>-1</sup>.

### Single crystal and powder X-ray diffraction

Single crystal data collections ( $\lambda = 0.71073 \text{ \AA}$ ) were performed using a Bruker D8 Venture with Cu and Mo microfocus X-ray sources and PHOTON II detector with Bruker APEX3 program. The Bruker SAINT software<sup>1</sup> was used for integration and data reduction, while absorption correction was performed using SADABS-2016/2<sup>2</sup>. Crystal structures (CCDC) were solved and refined using SHELXT 2014/5 and SHELXL 2018/3<sup>3,4</sup>.

XRD measurements on powdered samples were performed using a Bruker D8 Advance in Bragg–Brentano geometry under Cu K $\alpha$  radiation.

### Static and time-resolved photoluminescence

*Powder sample preparation:* the spectroscopic characterization was performed on perovskite powder samples encapsulated between 1mm glasses.

*Static Photoluminescence:* Temperature and pump fluence-dependent measurements were performed under vacuum using a Linkam Stage cooled with liquid nitrogen, exciting the sample with the third harmonic (355 nm) from a Nd:YAG Picolo-AOT laser (pulse length of approximately 1000 ps, 1 kHz repetition rate) focused on the sample with a 10 cm lens. PL was detected using a Maya1000 visible spectrometer.

*Time-resolved PL:* The same light source as for static temperature dependent measurements (Piccolo AOT at 355 nm) was used for time-resolved photoluminescence measurements on ns timescale. Measurements were performed under vacuum using a Linkam Stage cooled with liquid nitrogen. The PL was detected with an Andor iStar 320T ICCD camera coupled to a Shamrock 303i spectrograph using a temporal step size of 1 ns for sample (1,3-PDA)PbBr<sub>4</sub> and 10ns for (1,4-PDA)PbBr<sub>4</sub> and (1,4-XDA)PbBr<sub>4</sub> with a spectral resolution of 0.55 nm. The integration ranges used for the broad PL components are: 500 – 700 nm (1,4-PDA), 450 - 700 nm (1,4-XDA), 500-800 nm (1,3-PDA).

TRPL of the excitonic feature in the ps range was performed using a Hamamatsu streak camera and a Coherent Chameleon oscillator (pulse duration 30 fs, repetition rate 80 MHz) as a pump, using a pump wavelength  $\lambda = 360$  nm obtained by frequency doubling the fundamental at 780 nm in a BBO crystal. The measurements were performed using a measurement window 2000 ps long for all samples (temporal resolution 10 ps), while the fast component of 1,3-PDA was measured in a 180 ps window with the highest available temporal resolution (3.5 ps). The integration ranges used for the narrow PL components are: 400 - 450 nm (1,4-XDA), 390-420 nm (1,3-PDA).

### **Arrhenius Fit**

To estimate the activation energy of non-radiative recombination pathways we fit the PL intensity of the principal emission vs Temperature with an Arrhenius curve (Equation S1)

$$I(T) = \frac{I_0}{1 + C \exp\left(-\frac{\Delta E}{k_B T}\right)} \quad (\text{S1})$$

where  $I_0$  is the maximum of the intensity,  $\Delta E$  is the activation energy for the non-radiative recombination pathway and  $C$  is the frequency factor<sup>5</sup>.

## DFT Calculations

Density Functional Theory (DFT) calculations were performed with the *Gaussian16* package,<sup>6</sup> taking also advantage of *Gaussian16*'s implementation of solid-state calculations. Partly in line with recent recommendations by Das *et al.* for Pb-Br perovskites,<sup>7</sup> the chosen density functional was HSE06.<sup>8,9</sup> To model lead(II) electrons, we employed a Stuttgart-Dresden pseudopotential and basis set,<sup>10</sup> whereas electrons on remaining atoms were modelled in full with a 6-31G(*d,p*) basis set. Grids of approximately 750 *k*-points were requested for solid-state calculations. Charge distribution was assessed using both the *Charge Model 5* (CM5) and Mulliken population analysis methods.<sup>11,12</sup> All calculations are available electronically, in a separate zipped folder.

Figure S2 shows the charge distribution (CM5,<sup>11</sup> Mulliken)<sup>12</sup> on aminic protons (panel a) and bromide (panel b) in a variety of situations, as calculated by density functional theory at the HSE06<sup>8,9</sup>/SDD<sup>10</sup>/6-31G(*d,p*) level:

- (1,4-PDA)PbBr<sub>4</sub>:
  - Single-point energy calculation, experimental structure (dotted black line; black circles).
  - Geometry optimization (solid black line; black squares).
- (1,4-XDA)PbBr<sub>4</sub>:
  - As above (red replaces black).
- (1,3-PDA)PbBr<sub>4</sub>:
  - As above (green replaces red).
- 1,4-PDA<sup>2+</sup> (Figure S2a only):
  - Single-point energy calculation, gas phase, experimental perovskite structure (dotted gray line; gray circles).
  - Geometry optimization, gas phase (solid gray line; gray squares).
- 1,4-XDA<sup>2+</sup> (Figure S2a only):
  - As above (salmon replaces gray)
- 1,3-PDA<sup>2+</sup> (Figure S2a only):
  - As above (light green replaces salmon)
- Distorted [PbBr<sub>6</sub>]<sup>4+</sup> octahedron—(1,4-PDA)PbBr<sub>4</sub> geometry (Figure S2b only):

- Single-point energy calculation, gas phase (dotted gray line; gray x).
- Distorted  $[\text{PbBr}_6]^{4-}$  octahedron—(1,4-XDA) $\text{PbBr}_4$  geometry (Figure S2b only):
  - As above (salmon replaces gray)
- Distorted  $[\text{PbBr}_6]^{4-}$  octahedron—(1,3-PDA) $\text{PbBr}_4$  geometry (Figure S2b only):
  - As above (light green replaces salmon)
- Distorted  $[\text{Pb}_2\text{Br}_{11}]^{7-}$  octahedron—(1,4-PDA) $\text{PbBr}_4$  geometry (Figure S2b only):
  - Single-point energy calculation, gas phase (shorter dotted gray line; gray \*).
- Distorted  $[\text{Pb}_2\text{Br}_{11}]^{7-}$  octahedron—(1,4-XDA) $\text{PbBr}_4$  geometry (Figure S2b only):
  - As above (salmon replaces gray)
- Distorted  $[\text{Pb}_2\text{Br}_{11}]^{7-}$  octahedron—(1,3-PDA) $\text{PbBr}_4$  geometry (Figure S2b only):
  - As above (light green replaces salmon)
- $[\text{PbBr}_6]^{4-}$  octahedron, optimized in the gas phase to a 5<sup>th</sup> order transition state – (Figure S2b only; solid blue line; blue triangles; further optimization to a minimum leads to a tetrahedral  $[\text{PbBr}_4]^{2-}$  and 2 isolated  $\text{Br}^-$ ).

## Single crystal data refinement

### (1,3-PDA)PbBr<sub>4</sub>

|                                                                  |                                                         |
|------------------------------------------------------------------|---------------------------------------------------------|
| Br <sub>4</sub> Pb·C <sub>6</sub> H <sub>10</sub> N <sub>2</sub> | $F(000) = 1128$                                         |
| $M_r = 636.99$                                                   | $D_x = 3.116 \text{ Mg m}^{-3}$                         |
| Monoclinic, $C2/c$                                               | Mo $K\alpha$ radiation, $\lambda = 0.71073 \text{ \AA}$ |
| $a = 21.784 (7) \text{ \AA}$                                     | Cell parameters from 8793 reflections                   |
| $b = 8.821 (3) \text{ \AA}$                                      | $\theta = 2.5\text{--}28.9^\circ$                       |
| $c = 7.398 (3) \text{ \AA}$                                      | $\mu = 24.16 \text{ mm}^{-1}$                           |
| $\beta = 107.214 (9)^\circ$                                      | $T = 303 \text{ K}$                                     |
| $V = 1357.8 (8) \text{ \AA}^3$                                   | Plate, dull dark brown                                  |
| $Z = 4$                                                          | $0.2 \times 0.15 \times 0.05 \text{ mm}$                |

### Data collection

|                                                                        |                                                                        |
|------------------------------------------------------------------------|------------------------------------------------------------------------|
| Bruker SMART APEX2 area detector diffractometer                        | 1341 independent reflections                                           |
| Radiation source: microfocus sealed X-ray tube, Incoatec $\mu\text{s}$ | 1073 reflections with $I > 2\sigma(I)$                                 |
| Mirror optics monochromator                                            | $R_{\text{int}} = 0.024$                                               |
| Detector resolution: $7.9 \text{ pixels mm}^{-1}$                      | $\theta_{\text{max}} = 28.8^\circ$ , $\theta_{\text{min}} = 2.5^\circ$ |
| $\omega$ and $\phi$ scans                                              | $h = -29 \rightarrow 15$                                               |
| Absorption correction: multi-scan                                      | $k = -11 \rightarrow 3$                                                |
| $T_{\text{min}} = 0.496$ , $T_{\text{max}} = 0.746$                    | $l = -7 \rightarrow 8$                                                 |
| 1712 measured reflections                                              |                                                                        |

### Refinement

|                                 |                                                                           |
|---------------------------------|---------------------------------------------------------------------------|
| Refinement on $F^2$             | Primary atom site location: dual                                          |
| Least-squares matrix: full      | Hydrogen site location: inferred from neighbouring sites                  |
| $R[F^2 > 2\sigma(F^2)] = 0.035$ | H-atom parameters constrained                                             |
| $wR(F^2) = 0.090$               | $w = 1/[\sigma^2(F_o^2) + (0.0453P)^2]$<br>where $P = (F_o^2 + 2F_c^2)/3$ |
| $S = 1.05$                      | $(\Delta/\sigma)_{\text{max}} < 0.001$                                    |
| 1341 reflections                | $\Delta)_{\text{max}} = 0.95 \text{ e \AA}^{-3}$                          |
| 63 parameters                   | $\Delta)_{\text{min}} = -1.03 \text{ e \AA}^{-3}$                         |
| 0 restraints                    |                                                                           |

## Special details

*Geometry.* All esds (except the esd in the dihedral angle between two l.s. planes) are estimated using the full covariance matrix. The cell esds are taken into account individually in the estimation of esds in distances, angles and torsion angles; correlations between esds in cell parameters are only used when they are defined by crystal symmetry. An approximate (isotropic) treatment of cell esds is used for estimating esds involving l.s. planes.

## Fractional atomic coordinates and isotropic or equivalent isotropic displacement parameters ( $\text{\AA}^2$ )

|      | x           | y            | z            | $U_{\text{iso}}^*/U_{\text{eq}}$ |
|------|-------------|--------------|--------------|----------------------------------|
| Pb01 | 0.750000    | 0.750000     | 0.500000     | 0.03090 (16)                     |
| Br02 | 0.61047 (4) | 0.66824 (9)  | 0.36323 (18) | 0.0496 (3)                       |
| Br03 | 0.77138 (5) | 0.56542 (12) | 0.18312 (19) | 0.0543 (3)                       |
| C005 | 0.500000    | 0.2998 (12)  | 0.250000     | 0.036 (3)                        |
| H005 | 0.500000    | 0.405267     | 0.250000     | 0.043*                           |
| C006 | 0.500000    | -0.0124 (11) | 0.250000     | 0.056 (5)                        |
| H006 | 0.500000    | -0.117877    | 0.250000     | 0.067*                           |
| C2   | 0.4444 (4)  | 0.2192 (8)   | 0.1713 (16)  | 0.035 (2)                        |
| C4   | 0.4440 (4)  | 0.0640 (8)   | 0.1678 (17)  | 0.047 (3)                        |
| H4   | 0.406302    | 0.011287     | 0.110473     | 0.056*                           |
| N1   | 0.3836 (3)  | 0.2976 (8)   | 0.0828 (15)  | 0.052 (3)                        |
| H1A  | 0.376686    | 0.301131     | -0.041922    | 0.062*                           |
| H1B  | 0.385634    | 0.391543     | 0.128178     | 0.062*                           |
| H1C  | 0.351607    | 0.247886     | 0.108242     | 0.062*                           |

## Atomic displacement parameters ( $\text{\AA}^2$ )

|      | $U^{11}$   | $U^{22}$   | $U^{33}$    | $U^{12}$      | $U^{13}$     | $U^{23}$      |
|------|------------|------------|-------------|---------------|--------------|---------------|
| Pb01 | 0.0324 (2) | 0.0277 (2) | 0.0310 (4)  | -0.00035 (14) | 0.00691 (18) | -0.00391 (17) |
| Br02 | 0.0349 (4) | 0.0350 (4) | 0.0735 (10) | 0.0017 (3)    | 0.0076 (5)   | -0.0007 (4)   |
| Br03 | 0.0529 (5) | 0.0656 (6) | 0.0486 (10) | -0.0122 (4)   | 0.0215 (5)   | -0.0244 (5)   |
| C005 | 0.035 (6)  | 0.031 (4)  | 0.045 (11)  | 0.000         | 0.018 (6)    | 0.000         |
| C006 | 0.033 (6)  | 0.021 (4)  | 0.120 (17)  | 0.000         | 0.030 (8)    | 0.000         |
| C2   | 0.033 (4)  | 0.032 (3)  | 0.039 (8)   | 0.005 (3)     | 0.007 (4)    | 0.004 (3)     |
| C4   | 0.032 (4)  | 0.030 (3)  | 0.077 (10)  | -0.005 (3)    | 0.016 (4)    | -0.005 (4)    |
| N1   | 0.037 (4)  | 0.037 (3)  | 0.071 (9)   | 0.003 (3)     | 0.002 (4)    | 0.008 (4)     |

## Geometric parameters ( $\text{\AA}$ , $^\circ$ )

|                         |             |                       |            |
|-------------------------|-------------|-----------------------|------------|
| Pb01—Br02 <sup>i</sup>  | 2.9936 (12) | C006—H006             | 0.9300     |
| Pb01—Br02               | 2.9937 (12) | C006—C4 <sup>iv</sup> | 1.368 (10) |
| Pb01—Br03 <sup>ii</sup> | 3.0692 (13) | C006—C4               | 1.368 (10) |

|                                              |             |                              |            |
|----------------------------------------------|-------------|------------------------------|------------|
| Pb01—Br03                                    | 3.0016 (14) | C2—C4                        | 1.370 (10) |
| Pb01—Br03 <sup>iii</sup>                     | 3.0692 (13) | C2—N1                        | 1.465 (10) |
| Pb01—Br03 <sup>i</sup>                       | 3.0015 (14) | C4—H4                        | 0.9300     |
| C005—H005                                    | 0.9300      | N1—H1A                       | 0.8900     |
| C005—C2 <sup>iv</sup>                        | 1.376 (10)  | N1—H1B                       | 0.8900     |
| C005—C2                                      | 1.376 (10)  | N1—H1C                       | 0.8900     |
|                                              |             |                              |            |
| Br02 <sup>i</sup> —Pb01—Br02                 | 180.0       | C2—C005—H005                 | 121.1      |
| Br02—Pb01—Br03                               | 88.97 (3)   | C2—C005—C2 <sup>iv</sup>     | 117.8 (10) |
| Br02 <sup>i</sup> —Pb01—Br03 <sup>iii</sup>  | 86.39 (3)   | C4—C006—H006                 | 119.5      |
| Br02 <sup>i</sup> —Pb01—Br03 <sup>i</sup>    | 88.97 (3)   | C4 <sup>iv</sup> —C006—H006  | 119.5      |
| Br02—Pb01—Br03 <sup>ii</sup>                 | 86.39 (3)   | C4 <sup>iv</sup> —C006—C4    | 121.0 (10) |
| Br02—Pb01—Br03 <sup>i</sup>                  | 91.03 (3)   | C005—C2—N1                   | 120.7 (7)  |
| Br02—Pb01—Br03 <sup>iii</sup>                | 93.61 (3)   | C4—C2—C005                   | 121.6 (8)  |
| Br02 <sup>i</sup> —Pb01—Br03                 | 91.03 (3)   | C4—C2—N1                     | 117.7 (8)  |
| Br02 <sup>i</sup> —Pb01—Br03 <sup>ii</sup>   | 93.61 (3)   | C006—C4—C2                   | 119.0 (8)  |
| Br03 <sup>ii</sup> —Pb01—Br03 <sup>iii</sup> | 180.0       | C006—C4—H4                   | 120.5      |
| Br03—Pb01—Br03 <sup>ii</sup>                 | 79.32 (3)   | C2—C4—H4                     | 120.5      |
| Br03—Pb01—Br03 <sup>iii</sup>                | 100.68 (3)  | C2—N1—H1A                    | 109.5      |
| Br03 <sup>i</sup> —Pb01—Br03                 | 180.0       | C2—N1—H1B                    | 109.5      |
| Br03 <sup>i</sup> —Pb01—Br03 <sup>iii</sup>  | 79.32 (3)   | C2—N1—H1C                    | 109.5      |
| Br03 <sup>i</sup> —Pb01—Br03 <sup>ii</sup>   | 100.68 (3)  | H1A—N1—H1B                   | 109.5      |
| Pb01—Br03—Pb01 <sup>v</sup>                  | 142.95 (4)  | H1A—N1—H1C                   | 109.5      |
| C2 <sup>iv</sup> —C005—H005                  | 121.1       | H1B—N1—H1C                   | 109.5      |
|                                              |             |                              |            |
| C005—C2—C4—C006                              | 2.1 (16)    | C4 <sup>iv</sup> —C006—C4—C2 | -1.0 (8)   |
| C2 <sup>iv</sup> —C005—C2—C4                 | -1.1 (8)    | N1—C2—C4—C006                | -179.8 (9) |
| C2 <sup>iv</sup> —C005—C2—N1                 | -179.2 (12) |                              |            |

Symmetry codes: (i)  $-x+3/2, -y+3/2, -z+1$ ; (ii)  $x, -y+1, z+1/2$ ; (iii)  $-x+3/2, y+1/2, -z+1/2$ ; (iv)  $-x+1, y, -z+1/2$ ; (v)  $-x+3/2, y-1/2, -z+1/2$ .

### (1,3-XDA)PbBr<sub>4</sub>

|                                                                      |                                                         |
|----------------------------------------------------------------------|---------------------------------------------------------|
| Br <sub>6</sub> Pb·2(C <sub>8</sub> H <sub>14</sub> N <sub>2</sub> ) | $F(000) = 888$                                          |
| $M_r = 963.07$                                                       | $D_x = 2.461 \text{ Mg m}^{-3}$                         |
| Monoclinic, $P2_1/c$                                                 | Mo $K\alpha$ radiation, $\lambda = 0.71073 \text{ \AA}$ |
| $a = 10.7571 (18) \text{ \AA}$                                       | Cell parameters from 463 reflections                    |
| $b = 14.525 (3) \text{ \AA}$                                         | $\theta = 2.8\text{--}29.5^\circ$                       |
| $c = 8.5545 (10) \text{ \AA}$                                        | $\mu = 15.73 \text{ mm}^{-1}$                           |
| $\beta = 103.540 (4)^\circ$                                          | $T = 299 \text{ K}$                                     |

|                                |                                          |
|--------------------------------|------------------------------------------|
| $V = 1299.4 (4) \text{ \AA}^3$ | Plate, clear light colourless            |
| $Z = 2$                        | $0.1 \times 0.06 \times 0.02 \text{ mm}$ |

### Data collection

|                                                                    |                                                                        |
|--------------------------------------------------------------------|------------------------------------------------------------------------|
| Bruker APEX-II CCD diffractometer                                  | 1816 independent reflections                                           |
| Radiation source: microfocus sealed X-ray tube, Incoatec I $\mu$ s | 1198 reflections with $I > 2\sigma(I)$                                 |
| Mirror optics monochromator                                        | $R_{\text{int}} = 0.138$                                               |
| Detector resolution: 7.9 pixels $\text{mm}^{-1}$                   | $\theta_{\text{max}} = 23.1^\circ$ , $\theta_{\text{min}} = 2.4^\circ$ |
| $\phi$ and $\omega$ scans                                          | $h = -11 \rightarrow 11$                                               |
| Absorption correction: multi-scan                                  | $k = -16 \rightarrow 16$                                               |
| $T_{\text{min}} = 0.387$ , $T_{\text{max}} = 0.746$                | $l = -9 \rightarrow 9$                                                 |
| 6279 measured reflections                                          |                                                                        |

### Refinement

|                                 |                                                                                     |
|---------------------------------|-------------------------------------------------------------------------------------|
| Refinement on $F^2$             | Primary atom site location: dual                                                    |
| Least-squares matrix: full      | Hydrogen site location: inferred from neighbouring sites                            |
| $R[F^2 > 2\sigma(F^2)] = 0.056$ | H-atom parameters constrained                                                       |
| $wR(F^2) = 0.109$               | $w = 1/[\sigma^2(F_o^2) + (0.0102P)^2 + 4.5929P]$<br>where $P = (F_o^2 + 2F_c^2)/3$ |
| $S = 1.03$                      | $(\Delta/\sigma)_{\text{max}} < 0.001$                                              |
| 1816 reflections                | $\Delta_{\text{max}} = 1.03 \text{ e \AA}^{-3}$                                     |
| 126 parameters                  | $\Delta_{\text{min}} = -1.20 \text{ e \AA}^{-3}$                                    |
| 36 restraints                   |                                                                                     |

### Special details

*Geometry.* All esds (except the esd in the dihedral angle between two l.s. planes) are estimated using the full covariance matrix. The cell esds are taken into account individually in the estimation of esds in distances, angles and torsion angles; correlations between esds in cell parameters are only used when they are defined by crystal symmetry. An approximate (isotropic) treatment of cell esds is used for estimating esds involving l.s. planes.

### Fractional atomic coordinates and isotropic or equivalent isotropic displacement parameters ( $\text{\AA}^2$ )

|      | $x$          | $y$          | $z$         | $U_{\text{iso}}^*/U_{\text{eq}}$ |
|------|--------------|--------------|-------------|----------------------------------|
| Pb01 | 0.000000     | 0.500000     | 0.500000    | 0.0298 (3)                       |
| Br02 | 0.05277 (19) | 0.68916 (12) | 0.3861 (2)  | 0.0387 (5)                       |
| Br03 | 0.1157 (2)   | 0.42698 (13) | 0.2340 (2)  | 0.0425 (6)                       |
| Br04 | 0.24668 (19) | 0.47621 (13) | 0.7576 (2)  | 0.0421 (6)                       |
| N005 | 0.1922 (13)  | 0.6156 (9)   | 1.0435 (15) | 0.033 (4)                        |
| H00A | 0.203815     | 0.586873     | 0.956124    | 0.040*                           |



|      |             |             |             |           |
|------|-------------|-------------|-------------|-----------|
| H00B | 0.155345    | 0.669941    | 1.015746    | 0.040*    |
| H00C | 0.142085    | 0.581580    | 1.089898    | 0.040*    |
| N006 | 0.8163 (14) | 0.7215 (9)  | 1.0566 (16) | 0.038 (4) |
| H00D | 0.878431    | 0.712810    | 1.005354    | 0.045*    |
| H00E | 0.812598    | 0.673304    | 1.119716    | 0.045*    |
| H00F | 0.832236    | 0.772211    | 1.116263    | 0.045*    |
| C007 | 0.5784 (16) | 0.7519 (12) | 1.0059 (18) | 0.027 (4) |
| C008 | 0.5540 (17) | 0.8432 (12) | 1.034 (2)   | 0.038 (5) |
| H008 | 0.606511    | 0.889824    | 1.011463    | 0.046*    |
| C009 | 0.3760 (16) | 0.7970 (12) | 1.1373 (18) | 0.029 (4) |
| H009 | 0.308952    | 0.813186    | 1.183351    | 0.035*    |
| C00A | 0.4500 (16) | 0.8635 (12) | 1.097 (2)   | 0.037 (5) |
| H00G | 0.430365    | 0.924807    | 1.111167    | 0.044*    |
| C00B | 0.6907 (18) | 0.7317 (14) | 0.936 (2)   | 0.046 (6) |
| H00H | 0.698636    | 0.780881    | 0.862224    | 0.055*    |
| H00I | 0.673575    | 0.675279    | 0.873887    | 0.055*    |
| C00C | 0.3986 (18) | 0.7029 (14) | 1.111 (2)   | 0.039 (5) |
| C00D | 0.3210 (19) | 0.6300 (13) | 1.161 (2)   | 0.049 (6) |
| H00J | 0.306632    | 0.645581    | 1.265722    | 0.059*    |
| H00K | 0.368576    | 0.572676    | 1.172210    | 0.059*    |
| C00E | 0.5056 (18) | 0.6840 (13) | 1.0481 (18) | 0.038 (5) |
| H00L | 0.527217    | 0.622934    | 1.034868    | 0.046*    |

*Atomic displacement parameters (Å<sup>2</sup>)*

|      | $U^{11}$    | $U^{22}$    | $U^{33}$    | $U^{12}$    | $U^{13}$    | $U^{23}$    |
|------|-------------|-------------|-------------|-------------|-------------|-------------|
| Pb01 | 0.0334 (6)  | 0.0257 (6)  | 0.0317 (6)  | 0.0037 (5)  | 0.0107 (5)  | 0.0009 (5)  |
| Br02 | 0.0383 (13) | 0.0297 (11) | 0.0467 (12) | -0.0019 (9) | 0.0072 (10) | 0.0007 (9)  |
| Br03 | 0.0545 (15) | 0.0329 (12) | 0.0468 (12) | 0.0059 (10) | 0.0254 (11) | 0.0001 (9)  |
| Br04 | 0.0372 (13) | 0.0406 (13) | 0.0481 (12) | 0.0001 (10) | 0.0091 (10) | 0.0054 (10) |
| N005 | 0.033 (10)  | 0.027 (9)   | 0.033 (9)   | -0.004 (7)  | -0.006 (8)  | 0.000 (7)   |
| N006 | 0.046 (11)  | 0.032 (9)   | 0.038 (10)  | 0.007 (8)   | 0.014 (9)   | -0.001 (7)  |
| C007 | 0.023 (10)  | 0.035 (11)  | 0.021 (9)   | -0.002 (9)  | -0.002 (8)  | -0.009 (8)  |
| C008 | 0.027 (11)  | 0.040 (11)  | 0.049 (11)  | -0.004 (9)  | 0.013 (9)   | -0.014 (9)  |
| C009 | 0.022 (11)  | 0.043 (11)  | 0.024 (10)  | 0.007 (9)   | 0.007 (8)   | -0.007 (9)  |
| C00A | 0.016 (10)  | 0.030 (11)  | 0.053 (12)  | 0.013 (9)   | -0.013 (9)  | 0.001 (9)   |
| C00B | 0.041 (14)  | 0.064 (15)  | 0.040 (12)  | 0.007 (12)  | 0.023 (11)  | 0.009 (11)  |
| C00C | 0.027 (11)  | 0.051 (12)  | 0.032 (11)  | -0.014 (10) | -0.003 (9)  | 0.004 (9)   |
| C00D | 0.063 (17)  | 0.048 (14)  | 0.029 (12)  | 0.014 (12)  | -0.002 (11) | 0.008 (10)  |
| C00E | 0.045 (13)  | 0.041 (12)  | 0.027 (11)  | 0.002 (10)  | 0.008 (10)  | -0.005 (9)  |

*Geometric parameters (Å, °)*

|                                           |             |                |            |
|-------------------------------------------|-------------|----------------|------------|
| Pb01—Br02                                 | 3.0132 (19) | C007—C00B      | 1.50 (2)   |
| Pb01—Br02 <sup>i</sup>                    | 3.0133 (19) | C007—C00E      | 1.36 (2)   |
| Pb01—Br03                                 | 3.0298 (17) | C008—H008      | 0.9300     |
| Pb01—Br03 <sup>i</sup>                    | 3.0298 (17) | C008—C00A      | 1.38 (2)   |
| Pb01—Br04 <sup>i</sup>                    | 3.046 (2)   | C009—H009      | 0.9300     |
| Pb01—Br04                                 | 3.046 (2)   | C009—C00A      | 1.35 (2)   |
| N005—H00A                                 | 0.8900      | C009—C00C      | 1.41 (2)   |
| N005—H00B                                 | 0.8900      | C00A—H00G      | 0.9300     |
| N005—H00C                                 | 0.8900      | C00B—H00H      | 0.9700     |
| N005—C00D                                 | 1.52 (2)    | C00B—H00I      | 0.9700     |
| N006—H00D                                 | 0.8900      | C00C—C00D      | 1.47 (2)   |
| N006—H00E                                 | 0.8900      | C00C—C00E      | 1.41 (2)   |
| N006—H00F                                 | 0.8900      | C00D—H00J      | 0.9700     |
| N006—C00B                                 | 1.50 (2)    | C00D—H00K      | 0.9700     |
| C007—C008                                 | 1.38 (2)    | C00E—H00L      | 0.9300     |
|                                           |             |                |            |
| Br02—Pb01—Br02 <sup>i</sup>               | 180.0       | C00E—C007—C00B | 122.1 (17) |
| Br02 <sup>i</sup> —Pb01—Br03 <sup>i</sup> | 86.25 (5)   | C007—C008—H008 | 120.8      |
| Br02 <sup>i</sup> —Pb01—Br03              | 93.75 (5)   | C00A—C008—C007 | 118.4 (17) |
| Br02—Pb01—Br03 <sup>i</sup>               | 93.75 (5)   | C00A—C008—H008 | 120.8      |
| Br02—Pb01—Br03                            | 86.25 (5)   | C00A—C009—H009 | 119.4      |
| Br02 <sup>i</sup> —Pb01—Br04 <sup>i</sup> | 98.00 (5)   | C00A—C009—C00C | 121.2 (16) |
| Br02 <sup>i</sup> —Pb01—Br04              | 82.00 (5)   | C00C—C009—H009 | 119.4      |
| Br02—Pb01—Br04                            | 98.00 (5)   | C008—C00A—H00G | 119.1      |
| Br02—Pb01—Br04 <sup>i</sup>               | 82.00 (5)   | C009—C00A—C008 | 121.9 (17) |
| Br03 <sup>i</sup> —Pb01—Br03              | 180.0       | C009—C00A—H00G | 119.1      |
| Br03—Pb01—Br04                            | 93.56 (5)   | N006—C00B—H00H | 108.5      |
| Br03 <sup>i</sup> —Pb01—Br04              | 86.44 (5)   | N006—C00B—H00I | 108.5      |
| Br03—Pb01—Br04 <sup>i</sup>               | 86.44 (5)   | C007—C00B—N006 | 115.1 (13) |
| Br03 <sup>i</sup> —Pb01—Br04 <sup>i</sup> | 93.56 (5)   | C007—C00B—H00H | 108.5      |
| Br04 <sup>i</sup> —Pb01—Br04              | 180.0       | C007—C00B—H00I | 108.5      |
| H00A—N005—H00B                            | 109.5       | H00H—C00B—H00I | 107.5      |
| H00A—N005—H00C                            | 109.5       | C009—C00C—C00D | 121.2 (17) |
| H00B—N005—H00C                            | 109.5       | C00E—C00C—C009 | 115.8 (16) |
| C00D—N005—H00A                            | 109.5       | C00E—C00C—C00D | 122.7 (18) |
| C00D—N005—H00B                            | 109.5       | N005—C00D—H00J | 108.9      |
| C00D—N005—H00C                            | 109.5       | N005—C00D—H00K | 108.9      |
| H00D—N006—H00E                            | 109.5       | C00C—C00D—N005 | 113.4 (14) |
| H00D—N006—H00F                            | 109.5       | C00C—C00D—H00J | 108.9      |
| H00E—N006—H00F                            | 109.5       | C00C—C00D—H00K | 108.9      |
| C00B—N006—H00D                            | 109.5       | H00J—C00D—H00K | 107.7      |

|                         |            |                         |             |
|-------------------------|------------|-------------------------|-------------|
| C00B—N006—H00E          | 109.5      | C007—C00E—C00C          | 122.2 (17)  |
| C00B—N006—H00F          | 109.5      | C007—C00E—H00L          | 118.9       |
| C008—C007—C00B          | 117.5 (16) | C00C—C00E—H00L          | 118.9       |
| C00E—C007—C008          | 120.4 (16) |                         |             |
|                         |            |                         |             |
| C007—C008—<br>C00A—C009 | 3 (3)      | C00B—C007—<br>C008—C00A | 179.2 (16)  |
| C008—C007—<br>C00B—N006 | 87 (2)     | C00B—C007—<br>C00E—C00C | -178.8 (16) |
| C008—C007—<br>C00E—C00C | 4 (3)      | C00C—C009—<br>C00A—C008 | -3 (3)      |
| C009—C00C—<br>C00D—N005 | 80 (2)     | C00D—C00C—<br>C00E—C007 | -178.4 (17) |
| C009—C00C—<br>C00E—C007 | -4 (3)     | C00E—C007—<br>C008—C00A | -4 (3)      |
| C00A—C009—<br>C00C—C00D | 177.6 (17) | C00E—C007—<br>C00B—N006 | -90 (2)     |
| C00A—C009—<br>C00C—C00E | 3 (3)      | C00E—C00C—<br>C00D—N005 | -105 (2)    |

Symmetry code: (i)  $-x, -y+1, -z+1$ .

## (1,4-PDA)PbBr<sub>4</sub>

### Crystal data

|                                                                  |                                                         |
|------------------------------------------------------------------|---------------------------------------------------------|
| Br <sub>4</sub> Pb·C <sub>6</sub> H <sub>10</sub> N <sub>2</sub> | $Z = 2$                                                 |
| $M_r = 636.99$                                                   | $F(000) = 564$                                          |
| Triclinic, $P\bar{1}$                                            | $D_x = 3.211 \text{ Mg m}^{-3}$                         |
| $a = 7.434 (3) \text{ \AA}$                                      | Mo $K\alpha$ radiation, $\lambda = 0.71073 \text{ \AA}$ |
| $b = 8.712 (3) \text{ \AA}$                                      | Cell parameters from 2265 reflections                   |
| $c = 11.028 (4) \text{ \AA}$                                     | $\theta = 3.6\text{--}27.0^\circ$                       |
| $\alpha = 70.570 (19)^\circ$                                     | $\mu = 24.89 \text{ mm}^{-1}$                           |
| $\beta = 78.527 (19)^\circ$                                      | $T = 302 \text{ K}$                                     |
| $\gamma = 89.414 (19)^\circ$                                     | Block, clear light white                                |
| $V = 658.9 (4) \text{ \AA}^3$                                    | $0.05 \times 0.04 \times 0.04 \text{ mm}$               |

### Data collection

|                                   |                                                                     |
|-----------------------------------|---------------------------------------------------------------------|
| Bruker APEX-II CCD diffractometer | $R_{\text{int}} = 0.063$                                            |
| Mirror optics monochromator       | $\theta_{\text{max}} = 27.2^\circ, \theta_{\text{min}} = 2.5^\circ$ |
| $\phi$ and $\omega$ scans         | $h = -8 \rightarrow 8$                                              |
| 3512 measured reflections         | $k = -11 \rightarrow 10$                                            |
| 2016 independent reflections      | $l = -14 \rightarrow 13$                                            |

|                                        |  |
|----------------------------------------|--|
| 1244 reflections with $I > 2\sigma(I)$ |  |
|----------------------------------------|--|

### Refinement

|                                 |                                                                           |
|---------------------------------|---------------------------------------------------------------------------|
| Refinement on $F^2$             | 48 restraints                                                             |
| Least-squares matrix: full      | Hydrogen site location: inferred from neighbouring sites                  |
| $R[F^2 > 2\sigma(F^2)] = 0.065$ | H-atom parameters constrained                                             |
| $wR(F^2) = 0.171$               | $w = 1/[\sigma^2(F_o^2) + (0.0667P)^2]$<br>where $P = (F_o^2 + 2F_c^2)/3$ |
| $S = 1.09$                      | $(\Delta/\sigma)_{\max} < 0.001$                                          |
| 2016 reflections                | $\Delta)_{\max} = 2.19 \text{ e } \text{Å}^{-3}$                          |
| 123 parameters                  | $\Delta)_{\min} = -2.24 \text{ e } \text{Å}^{-3}$                         |

### Special details

*Geometry.* All esds (except the esd in the dihedral angle between two l.s. planes) are estimated using the full covariance matrix. The cell esds are taken into account individually in the estimation of esds in distances, angles and torsion angles; correlations between esds in cell parameters are only used when they are defined by crystal symmetry. An approximate (isotropic) treatment of cell esds is used for estimating esds involving l.s. planes.

### Fractional atomic coordinates and isotropic or equivalent isotropic displacement parameters ( $\text{Å}^2$ )

|      | <i>x</i>   | <i>y</i>   | <i>z</i>    | $U_{\text{iso}}^*/U_{\text{eq}}$ |
|------|------------|------------|-------------|----------------------------------|
| Pb01 | 1.000000   | 1.000000   | 0.500000    | 0.0348 (4)                       |
| Pb02 | 0.500000   | 0.500000   | 0.500000    | 0.0341 (4)                       |
| Br03 | 0.1703 (4) | 0.6986 (3) | 0.4560 (3)  | 0.0451 (7)                       |
| Br04 | 1.0852 (4) | 1.1549 (3) | 0.2083 (2)  | 0.0442 (7)                       |
| Br05 | 0.3653 (4) | 0.3594 (3) | 0.7888 (2)  | 0.0453 (7)                       |
| Br06 | 0.6506 (4) | 0.8083 (4) | 0.5249 (3)  | 0.0580 (9)                       |
| N007 | -0.057 (3) | 0.470 (2)  | 0.7702 (18) | 0.042 (5)                        |
| H00A | -0.074936  | 0.446191   | 0.700795    | 0.051*                           |
| H00B | 0.061727   | 0.463052   | 0.773939    | 0.051*                           |
| H00C | -0.089793  | 0.570196   | 0.763079    | 0.051*                           |
| N008 | -0.490 (3) | 0.011 (2)  | 1.2266 (19) | 0.049 (6)                        |
| H00D | -0.496101  | -0.085757  | 1.216269    | 0.059*                           |
| H00E | -0.601774  | 0.047215   | 1.238424    | 0.059*                           |
| H00F | -0.441572  | 0.001027   | 1.296478    | 0.059*                           |
| C009 | -0.371 (3) | 0.128 (2)  | 1.108 (2)   | 0.025 (4)                        |
| C00A | -0.161 (4) | 0.196 (3)  | 0.904 (2)   | 0.041 (6)                        |
| H00G | -0.087370  | 0.163463   | 0.839312    | 0.049*                           |
| C00B | -0.263 (4) | 0.081 (3)  | 1.012 (2)   | 0.047 (6)                        |
| H00H | -0.259684  | -0.029020  | 1.019908    | 0.056*                           |
| C00C | -0.165 (3) | 0.356 (3)  | 0.888 (2)   | 0.034 (5)                        |

|      |            |           |           |           |
|------|------------|-----------|-----------|-----------|
| C00D | -0.377 (3) | 0.292 (3) | 1.098 (2) | 0.042 (6) |
| H00I | -0.447554  | 0.324872  | 1.162959  | 0.051*    |
| C00E | -0.274 (3) | 0.400 (3) | 0.988 (2) | 0.037 (5) |
| H00J | -0.275976  | 0.510334  | 0.979438  | 0.045*    |

*Atomic displacement parameters (Å<sup>2</sup>)*

|      | $U^{11}$    | $U^{22}$    | $U^{33}$    | $U^{12}$     | $U^{13}$     | $U^{23}$     |
|------|-------------|-------------|-------------|--------------|--------------|--------------|
| Pb01 | 0.0365 (9)  | 0.0292 (7)  | 0.0364 (8)  | -0.0007 (6)  | -0.0024 (6)  | -0.0108 (6)  |
| Pb02 | 0.0365 (9)  | 0.0290 (7)  | 0.0349 (8)  | 0.0021 (6)   | -0.0047 (6)  | -0.0099 (6)  |
| Br03 | 0.0417 (16) | 0.0431 (15) | 0.0499 (16) | 0.0116 (12)  | -0.0075 (12) | -0.0163 (12) |
| Br04 | 0.0609 (19) | 0.0326 (13) | 0.0396 (15) | 0.0069 (13)  | -0.0105 (13) | -0.0130 (11) |
| Br05 | 0.0597 (19) | 0.0356 (14) | 0.0367 (15) | 0.0045 (13)  | -0.0031 (13) | -0.0113 (11) |
| Br06 | 0.0499 (19) | 0.0656 (19) | 0.064 (2)   | -0.0105 (15) | -0.0107 (15) | -0.0285 (15) |
| N007 | 0.046 (14)  | 0.028 (11)  | 0.042 (13)  | 0.004 (10)   | 0.006 (10)   | -0.007 (9)   |
| N008 | 0.053 (15)  | 0.030 (12)  | 0.050 (14)  | -0.007 (11)  | 0.005 (11)   | -0.003 (10)  |
| C009 | 0.022 (12)  | 0.029 (9)   | 0.024 (10)  | 0.013 (9)    | -0.018 (8)   | -0.002 (8)   |
| C00A | 0.068 (16)  | 0.025 (9)   | 0.029 (11)  | 0.006 (11)   | -0.005 (9)   | -0.012 (8)   |
| C00B | 0.063 (16)  | 0.031 (10)  | 0.038 (13)  | 0.013 (11)   | 0.005 (10)   | -0.009 (8)   |
| C00C | 0.030 (13)  | 0.029 (8)   | 0.045 (12)  | 0.001 (10)   | -0.001 (9)   | -0.020 (9)   |
| C00D | 0.031 (14)  | 0.036 (10)  | 0.056 (13)  | 0.004 (11)   | 0.006 (10)   | -0.018 (10)  |
| C00E | 0.032 (13)  | 0.032 (10)  | 0.050 (13)  | 0.005 (10)   | -0.001 (9)   | -0.021 (8)   |

*Geometric parameters (Å, °)*

|                                            |           |                |             |
|--------------------------------------------|-----------|----------------|-------------|
| Pb01—Br03 <sup>i</sup>                     | 3.045 (3) | N007—C00C      | 1.43 (3)    |
| Pb01—Br03 <sup>ii</sup>                    | 3.045 (3) | N008—H00D      | 0.8900      |
| Pb01—Br04 <sup>iii</sup>                   | 2.982 (3) | N008—H00E      | 0.8900      |
| Pb01—Br04                                  | 2.982 (3) | N008—H00F      | 0.8900      |
| Pb01—Br06 <sup>iii</sup>                   | 3.018 (3) | N008—C009      | 1.48 (3)    |
| Pb01—Br06                                  | 3.018 (3) | C009—C00B      | 1.37 (3)    |
| Pb02—Br03 <sup>iv</sup>                    | 3.010 (3) | C009—C00D      | 1.39 (3)    |
| Pb02—Br03                                  | 3.010 (3) | C00A—H00G      | 0.9300      |
| Pb02—Br05 <sup>iv</sup>                    | 2.968 (3) | C00A—C00B      | 1.37 (3)    |
| Pb02—Br05                                  | 2.968 (3) | C00A—C00C      | 1.34 (3)    |
| Pb02—Br06 <sup>iv</sup>                    | 3.037 (3) | C00B—H00H      | 0.9300      |
| Pb02—Br06                                  | 3.037 (3) | C00C—C00E      | 1.40 (3)    |
| N007—H00A                                  | 0.8900    | C00D—H00I      | 0.9300      |
| N007—H00B                                  | 0.8900    | C00D—C00E      | 1.35 (3)    |
| N007—H00C                                  | 0.8900    | C00E—H00J      | 0.9300      |
|                                            |           |                |             |
| Br03 <sup>ii</sup> —Pb01—Br03 <sup>i</sup> | 180.0     | Pb01—Br06—Pb02 | 143.81 (12) |

|                                               |             |                         |            |
|-----------------------------------------------|-------------|-------------------------|------------|
| Br04—Pb01—Br03 <sup>ii</sup>                  | 93.41 (7)   | H00A—N007—H00B          | 109.5      |
| Br04 <sup>iii</sup> —Pb01—Br03 <sup>i</sup>   | 93.41 (7)   | H00A—N007—H00C          | 109.5      |
| Br04—Pb01—Br03 <sup>i</sup>                   | 86.59 (7)   | H00B—N007—H00C          | 109.5      |
| Br04 <sup>iii</sup> —Pb01—Br03 <sup>ii</sup>  | 86.59 (7)   | C00C—N007—H00A          | 109.5      |
| Br04—Pb01—Br04 <sup>iii</sup>                 | 180.0       | C00C—N007—H00B          | 109.5      |
| Br04—Pb01—Br06 <sup>iii</sup>                 | 82.19 (8)   | C00C—N007—H00C          | 109.5      |
| Br04—Pb01—Br06                                | 97.81 (8)   | H00D—N008—H00E          | 109.5      |
| Br04 <sup>iii</sup> —Pb01—Br06                | 82.19 (8)   | H00D—N008—H00F          | 109.5      |
| Br04 <sup>iii</sup> —Pb01—Br06 <sup>iii</sup> | 97.81 (8)   | H00E—N008—H00F          | 109.5      |
| Br06 <sup>iii</sup> —Pb01—Br03 <sup>i</sup>   | 98.51 (8)   | C009—N008—H00D          | 109.5      |
| Br06—Pb01—Br03 <sup>ii</sup>                  | 98.51 (8)   | C009—N008—H00E          | 109.5      |
| Br06 <sup>iii</sup> —Pb01—Br03 <sup>ii</sup>  | 81.49 (8)   | C009—N008—H00F          | 109.5      |
| Br06—Pb01—Br03 <sup>i</sup>                   | 81.49 (8)   | C00B—C009—N008          | 122.8 (19) |
| Br06—Pb01—Br06 <sup>iii</sup>                 | 180.0       | C00B—C009—C00D          | 121 (2)    |
| Br03—Pb02—Br03 <sup>iv</sup>                  | 180.0       | C00D—C009—N008          | 116 (2)    |
| Br03—Pb02—Br06                                | 82.42 (8)   | C00B—C00A—H00G          | 119.0      |
| Br03—Pb02—Br06 <sup>iv</sup>                  | 97.58 (8)   | C00C—C00A—H00G          | 119.0      |
| Br03 <sup>iv</sup> —Pb02—Br06                 | 97.58 (8)   | C00C—C00A—C00B          | 122 (2)    |
| Br03 <sup>iv</sup> —Pb02—Br06 <sup>iv</sup>   | 82.42 (8)   | C009—C00B—H00H          | 120.3      |
| Br05—Pb02—Br03                                | 94.00 (8)   | C00A—C00B—C009          | 119 (2)    |
| Br05—Pb02—Br03 <sup>iv</sup>                  | 86.00 (8)   | C00A—C00B—H00H          | 120.3      |
| Br05 <sup>iv</sup> —Pb02—Br03                 | 86.00 (8)   | C00A—C00C—N007          | 119 (2)    |
| Br05 <sup>iv</sup> —Pb02—Br03 <sup>iv</sup>   | 94.00 (8)   | C00A—C00C—C00E          | 117 (2)    |
| Br05—Pb02—Br05 <sup>iv</sup>                  | 180.00 (11) | C00E—C00C—N007          | 124 (2)    |
| Br05—Pb02—Br06                                | 91.20 (8)   | C009—C00D—H00I          | 121.5      |
| Br05—Pb02—Br06 <sup>iv</sup>                  | 88.80 (8)   | C00E—C00D—C009          | 117 (2)    |
| Br05 <sup>iv</sup> —Pb02—Br06                 | 88.80 (8)   | C00E—C00D—H00I          | 121.5      |
| Br05 <sup>iv</sup> —Pb02—Br06 <sup>iv</sup>   | 91.20 (8)   | C00C—C00E—H00J          | 118.3      |
| Br06 <sup>iv</sup> —Pb02—Br06                 | 180.0       | C00D—C00E—C00C          | 123 (2)    |
| Pb02—Br03—Pb01 <sup>v</sup>                   | 140.42 (10) | C00D—C00E—H00J          | 118.3      |
|                                               |             |                         |            |
| N007—C00C—<br>C00E—C00D                       | 179 (2)     | C00B—C009—<br>C00D—C00E | 1 (4)      |
| N008—C009—<br>C00B—C00A                       | 179 (2)     | C00B—C00A—<br>C00C—N007 | -179 (2)   |
| N008—C009—<br>C00D—C00E                       | -178 (2)    | C00B—C00A—<br>C00C—C00E | 2 (4)      |
| C009—C00D—<br>C00E—C00C                       | 0 (4)       | C00C—C00A—<br>C00B—C009 | -1 (4)     |
| C00A—C00C—<br>C00E—C00D                       | -1 (4)      | C00D—C009—<br>C00B—C00A | -1 (4)     |

Symmetry codes: (i)  $x+1, y, z$ ; (ii)  $-x+1, -y+2, -z+1$ ; (iii)  $-x+2, -y+2, -z+1$ ; (iv)  $-x+1, -y+1, -z+1$ ; (v)  $x-1, y,$

z.

**(1,4-XDA)PbBr<sub>4</sub>**

|                                                                  |                                                         |
|------------------------------------------------------------------|---------------------------------------------------------|
| Br <sub>4</sub> Pb·C <sub>8</sub> H <sub>14</sub> N <sub>2</sub> | $F(000) = 596$                                          |
| $M_r = 665.04$                                                   | $D_x = 2.688 \text{ Mg m}^{-3}$                         |
| Monoclinic, $P2_1/c$                                             | Mo $K\alpha$ radiation, $\lambda = 0.71073 \text{ \AA}$ |
| $a = 12.3274 (7) \text{ \AA}$                                    | Cell parameters from 7438 reflections                   |
| $b = 8.1618 (4) \text{ \AA}$                                     | $\theta = 3.0\text{--}32.0^\circ$                       |
| $c = 8.1675 (4) \text{ \AA}$                                     | $\mu = 19.97 \text{ mm}^{-1}$                           |
| $\beta = 90.817 (2)^\circ$                                       | $T = 299 \text{ K}$                                     |
| $V = 821.68 (7) \text{ \AA}^3$                                   | Plate, clear light yellow                               |
| $Z = 2$                                                          | $0.1 \times 0.06 \times 0.04 \text{ mm}$                |

**Data collection**

|                                                                                                                                                                                                                                                                               |                                                                        |
|-------------------------------------------------------------------------------------------------------------------------------------------------------------------------------------------------------------------------------------------------------------------------------|------------------------------------------------------------------------|
| Bruker SMART APEX2 area detector diffractometer                                                                                                                                                                                                                               | 3501 independent reflections                                           |
| Radiation source: microfocus sealed X-ray tube, Incoatec I $\mu$ s                                                                                                                                                                                                            | 2198 reflections with $I > 2\sigma(I)$                                 |
| Mirror optics monochromator                                                                                                                                                                                                                                                   | $R_{\text{int}} = 0.048$                                               |
| Detector resolution: $7.9 \text{ pixels mm}^{-1}$                                                                                                                                                                                                                             | $\theta_{\text{max}} = 35.0^\circ$ , $\theta_{\text{min}} = 3.0^\circ$ |
| $\omega$ and $\phi$ scans                                                                                                                                                                                                                                                     | $h = -17 \rightarrow 19$                                               |
| Absorption correction: multi-scan SADABS2016/2 (Bruker,2016/2) was used for absorption correction. $wR2(\text{int})$ was 0.1002 before and 0.0515 after correction. The Ratio of minimum to maximum transmission is 0.5817. The $\lambda/2$ correction factor is Not present. | $k = -9 \rightarrow 12$                                                |
| $T_{\text{min}} = 0.435$ , $T_{\text{max}} = 0.747$                                                                                                                                                                                                                           | $l = -13 \rightarrow 13$                                               |
| 9093 measured reflections                                                                                                                                                                                                                                                     |                                                                        |

**Refinement**

|                                 |                                                                        |
|---------------------------------|------------------------------------------------------------------------|
| Refinement on $F^2$             | 0 restraints                                                           |
| Least-squares matrix: full      | Hydrogen site location: inferred from neighbouring sites               |
| $R[F^2 > 2\sigma(F^2)] = 0.053$ | H-atom parameters constrained                                          |
| $wR(F^2) = 0.123$               | $w = 1/[\sigma^2(F_o^2) + 10.2448P]$<br>where $P = (F_o^2 + 2F_c^2)/3$ |
| $S = 1.11$                      | $(\Delta/\sigma)_{\text{max}} < 0.001$                                 |
| 3501 reflections                | $\Delta\rho_{\text{max}} = 1.58 \text{ e \AA}^{-3}$                    |
| 71 parameters                   | $\Delta\rho_{\text{min}} = -1.86 \text{ e \AA}^{-3}$                   |

**Special details**

*Geometry.* All esds (except the esd in the dihedral angle between two l.s. planes) are estimated using the full covariance matrix. The cell esds are taken into account individually in the estimation of esds in distances, angles and torsion angles; correlations between esds in cell parameters are only used when they are defined by crystal symmetry. An approximate (isotropic) treatment of cell esds is used for estimating esds involving l.s. planes.

*Fractional atomic coordinates and isotropic or equivalent isotropic displacement parameters ( $\text{\AA}^2$ )*

|      | <i>x</i>    | <i>y</i>     | <i>z</i>     | $U_{\text{iso}}^*/U_{\text{eq}}$ |
|------|-------------|--------------|--------------|----------------------------------|
| Pb01 | 0.500000    | 1.000000     | 0.500000     | 0.02888 (12)                     |
| N1   | 0.2886 (6)  | 0.5754 (10)  | 0.5727 (11)  | 0.0462 (19)                      |
| H1A  | 0.270996    | 0.677669     | 0.545463     | 0.055*                           |
| H1B  | 0.359728    | 0.561273     | 0.561607     | 0.055*                           |
| H1C  | 0.270681    | 0.556929     | 0.676247     | 0.055*                           |
| C3   | 0.0566 (9)  | 0.3954 (18)  | 0.5982 (18)  | 0.075 (4)                        |
| H3   | 0.093815    | 0.324965     | 0.668631     | 0.089*                           |
| Br02 | 0.50046 (8) | 0.81675 (11) | 0.81624 (11) | 0.0422 (2)                       |
| C1   | 0.2308 (10) | 0.4621 (16)  | 0.4667 (17)  | 0.067 (3)                        |
| H1D  | 0.252649    | 0.350927     | 0.493306     | 0.080*                           |
| H1E  | 0.249968    | 0.483141     | 0.353830     | 0.080*                           |
| Br03 | 0.25637 (8) | 0.97823 (13) | 0.48251 (13) | 0.0482 (2)                       |
| C2   | 0.1107 (7)  | 0.4778 (12)  | 0.4843 (13)  | 0.046 (2)                        |
| C4   | 0.0543 (10) | 0.586 (2)    | 0.3877 (18)  | 0.082 (5)                        |
| H4   | 0.091255    | 0.648719     | 0.311316     | 0.099*                           |

*Atomic displacement parameters ( $\text{\AA}^2$ )*

|      | $U^{11}$   | $U^{22}$     | $U^{33}$     | $U^{12}$      | $U^{13}$     | $U^{23}$      |
|------|------------|--------------|--------------|---------------|--------------|---------------|
| Pb01 | 0.0345 (2) | 0.02755 (18) | 0.02462 (18) | -0.00147 (18) | 0.00016 (13) | -0.00003 (16) |
| N1   | 0.037 (4)  | 0.044 (4)    | 0.057 (5)    | 0.000 (4)     | -0.001 (4)   | 0.004 (4)     |
| C3   | 0.029 (5)  | 0.098 (10)   | 0.097 (10)   | 0.009 (6)     | -0.001 (6)   | 0.049 (8)     |
| Br02 | 0.0517 (5) | 0.0397 (4)   | 0.0351 (4)   | -0.0047 (4)   | 0.0001 (4)   | 0.0128 (4)    |
| C1   | 0.052 (7)  | 0.071 (8)    | 0.077 (9)    | -0.004 (6)    | -0.004 (6)   | -0.004 (6)    |
| Br03 | 0.0380 (5) | 0.0514 (6)   | 0.0552 (6)   | 0.0028 (4)    | 0.0019 (4)   | 0.0022 (4)    |
| C2   | 0.031 (5)  | 0.051 (6)    | 0.056 (6)    | 0.000 (4)     | -0.005 (4)   | -0.005 (5)    |
| C4   | 0.052 (7)  | 0.107 (11)   | 0.088 (10)   | -0.007 (7)    | -0.002 (7)   | 0.046 (9)     |

*Geometric parameters ( $\text{\AA}$ ,  $^\circ$ )*

|                          |             |                     |            |
|--------------------------|-------------|---------------------|------------|
| Pb01—Br02 <sup>i</sup>   | 2.9846 (8)  | N1—C1               | 1.448 (14) |
| Pb01—Br02 <sup>ii</sup>  | 2.9894 (8)  | C3—H3               | 0.9300     |
| Pb01—Br02                | 2.9846 (8)  | C3—C2               | 1.334 (15) |
| Pb01—Br02 <sup>iii</sup> | 2.9894 (8)  | C3—C4 <sup>iv</sup> | 1.381 (17) |
| Pb01—Br03 <sup>i</sup>   | 3.0099 (10) | C1—H1D              | 0.9700     |



|                                              |             |                             |             |
|----------------------------------------------|-------------|-----------------------------|-------------|
| Pb01—Br03                                    | 3.0099 (10) | C1—H1E                      | 0.9700      |
| N1—H1A                                       | 0.8900      | C1—C2                       | 1.495 (15)  |
| N1—H1B                                       | 0.8900      | C2—C4                       | 1.369 (16)  |
| N1—H1C                                       | 0.8900      | C4—H4                       | 0.9300      |
|                                              |             |                             |             |
| Br02 <sup>i</sup> —Pb01—Br02                 | 180.0       | C1—N1—H1B                   | 109.5       |
| Br02—Pb01—Br02 <sup>iii</sup>                | 89.936 (9)  | C1—N1—H1C                   | 109.5       |
| Br02 <sup>i</sup> —Pb01—Br02 <sup>iii</sup>  | 90.064 (9)  | C2—C3—H3                    | 119.7       |
| Br02 <sup>i</sup> —Pb01—Br02 <sup>ii</sup>   | 89.936 (9)  | C2—C3—C4 <sup>iv</sup>      | 120.6 (11)  |
| Br02—Pb01—Br02 <sup>ii</sup>                 | 90.064 (9)  | C4 <sup>iv</sup> —C3—H3     | 119.7       |
| Br02 <sup>ii</sup> —Pb01—Br02 <sup>iii</sup> | 180.0       | Pb01—Br02—Pb01 <sup>v</sup> | 150.21 (4)  |
| Br02 <sup>iii</sup> —Pb01—Br03               | 93.78 (3)   | N1—C1—H1D                   | 109.3       |
| Br02—Pb01—Br03                               | 90.06 (3)   | N1—C1—H1E                   | 109.3       |
| Br02 <sup>i</sup> —Pb01—Br03                 | 89.94 (3)   | N1—C1—C2                    | 111.5 (10)  |
| Br02—Pb01—Br03 <sup>i</sup>                  | 89.94 (3)   | H1D—C1—H1E                  | 108.0       |
| Br02 <sup>ii</sup> —Pb01—Br03                | 86.22 (3)   | C2—C1—H1D                   | 109.3       |
| Br02 <sup>ii</sup> —Pb01—Br03 <sup>i</sup>   | 93.78 (3)   | C2—C1—H1E                   | 109.3       |
| Br02 <sup>i</sup> —Pb01—Br03 <sup>i</sup>    | 90.06 (3)   | C3—C2—C1                    | 122.0 (10)  |
| Br02 <sup>iii</sup> —Pb01—Br03 <sup>i</sup>  | 86.22 (3)   | C3—C2—C4                    | 118.2 (10)  |
| Br03 <sup>i</sup> —Pb01—Br03                 | 180.0       | C4—C2—C1                    | 119.7 (11)  |
| H1A—N1—H1B                                   | 109.5       | C3 <sup>iv</sup> —C4—H4     | 119.4       |
| H1A—N1—H1C                                   | 109.5       | C2—C4—C3 <sup>iv</sup>      | 121.1 (12)  |
| H1B—N1—H1C                                   | 109.5       | C2—C4—H4                    | 119.4       |
| C1—N1—H1A                                    | 109.5       |                             |             |
|                                              |             |                             |             |
| N1—C1—C2—C3                                  | -86.9 (15)  | C1—C2—C4—C3 <sup>iv</sup>   | -179.5 (13) |
| N1—C1—C2—C4                                  | 89.4 (15)   | C4 <sup>iv</sup> —C3—C2—C1  | 179.4 (13)  |
| C3—C2—C4—C3 <sup>iv</sup>                    | -3 (3)      | C4 <sup>iv</sup> —C3—C2—C4  | 3 (3)       |

Symmetry codes: (i)  $-x+1, -y+2, -z+1$ ; (ii)  $x, -y+3/2, z-1/2$ ; (iii)  $-x+1, y+1/2, -z+3/2$ ; (iv)  $-x, -y+1, -z+1$ ; (v)  $-x+1, y-1/2, -z+3/2$ .

## References

1. Bruker. *SAINT*; Bruker AXS Inc., 2015.
2. Bruker. *SADABS*; Bruker AXS Inc.: Madison, WI, USA, 2016.
3. Sheldrick, G. M. SHELXT – Integrated Space-Group and Crystal-Structure Determination. *Acta Cryst A* **2015**, *71* (1), 3–8. <https://doi.org/10.1107/S2053273314026370>.
4. Sheldrick, G. M. Crystal Structure Refinement with SHELXL. *Acta Cryst C* **2015**, *71* (1), 3–8. <https://doi.org/10.1107/S2053229614024218>.
5. Haiping Xu, Zhizhuan Zhang, Xuehua Dong, Ling Huang, Hongmei Zeng, Zhien Lin, and Guohong Zou, Corrugated 1D Hybrid Metal Halide [C<sub>6</sub>H<sub>7</sub>ClN]CdCl<sub>3</sub> Exhibiting Broadband White-Light Emission, *Inorganic Chemistry* **2022** *61* (11), 4752-4759, 10.1021/acs.inorgchem.2c00169
6. M. J. Frisch, G. W. Trucks, H. B. Schlegel, G. E. Scuseria, M. A. Robb, J. R. Cheeseman, G. Scalmani, V. Barone, G. A. Petersson, H. Nakatsuji, X. Li, M. Caricato, A. V. Marenich, J. Bloino, B. G. Janesko, R. Gomperts, B. Mennucci, H. P. Hratchian, J. V. Ortiz, A. F. Izmaylov, J. L. Sonnenberg, D. Williams-Young, F. Ding, F. Lipparini, F. Egidi, J. Goings, B. Peng, A. Petrone, T. Henderson, D. Ranasinghe, V. G. Zakrzewski, J. Gao, N. Rega, G. Zheng, W. Liang, M. Hada, M. Ehara, K. Toyota, R. Fukuda, J. Hasegawa, M. Ishida, T. Nakajima, Y. Honda, O. Kitao, H. Nakai, T. Vreven, K. Throssell, J. A. Montgomery, Jr., J. E. Peralta, F. Ogliaro, M. J. Bearpark, J. J. Heyd, E. N. Brothers, K. N. Kudin, V. N. Staroverov, T. A. Keith, R. Kobayashi, J. Normand, K. Raghavachari, A. P. Rendell, J. C. Burant, S. S. Iyengar, J. Tomasi, M. Cossi, J. M. Millam, M. Klene, C. Adamo, R. Cammi, J. W. Ochterski, R. L. Martin, K. Morokuma, O. Farkas, J. B. Foresman and D. J. Fox, *Gaussian16 Rev.C02*, 2016.
7. T. Das, G. Di Liberto and G. Pacchioni, *J. Phys. Chem. C*, 2022, **126**, 2184-2198.
8. J. Heyd, G. E. Scuseria and M. Ernzerhof, *J. Chem. Phys.*, 2003, **118**, 8207-8215.
9. J. Heyd, G. E. Scuseria and M. Ernzerhof, *J. Chem. Phys.*, 2006, **124**, 219906.
10. W. Küchle, M. Dolg, H. Stoll and H. Preuss, *Mol. Phys.*, 1991, **74**, 1245-1263.
11. A. V. Marenich, S. V. Jerome, C. J. Cramer and D. G. Truhlar, *J. Chem. Theory Comput.*, 2012, **8**, 527-541.
12. R. S. Mulliken, *J. Chem. Phys.*, 1955, **23**, 1833-1840.
